# Supplementary material for: An anthrax toxin variant with an improved activity in tumor targeting
Source: PubMed Central journal article supplement (PMC4653645; doi:10.1038/srep16267), 2015-11-20
Supplement: srep16267-s1.pdf [file srep16267-s1.pdf]

## Supplementary Information

### An anthrax toxin variant with an improved activity in tumor targeting

Alexander N. Wein<sup>1\*</sup>, Diane E. Peters<sup>2,3\*</sup>, Zaheer Valivullah<sup>1\*</sup>, Benjamin J. Hoover<sup>1</sup>, Aparna Tatineni<sup>1</sup>, Qian Ma<sup>1</sup>, Rasem Fattah<sup>1</sup>, Thomas H. Bugge<sup>2</sup>, Stephen H. Leppla<sup>1</sup>, and Shihui Liu<sup>1</sup>

<sup>1</sup>Microbial Pathogenesis Section, Laboratory of Parasitic Diseases, National Institute of Allergy and Infectious Diseases, National Institutes of Health, Bethesda, Maryland, USA

<sup>2</sup>Proteases and Tissue Remodeling Section, Oral and Pharyngeal Cancer Branch, National Institute of Dental and Craniofacial Research, National Institutes of Health, Bethesda, Maryland, USA

<sup>3</sup>Program of Pharmacology and Experimental Therapeutics, Tufts University School of Medicine, Boston, MA, USA

\*These authors contributed equally to this work

For correspondence: [shliu@niaid.nih.gov](mailto:shliu@niaid.nih.gov), or [sleppla@niaid.nih.gov](mailto:sleppla@niaid.nih.gov)

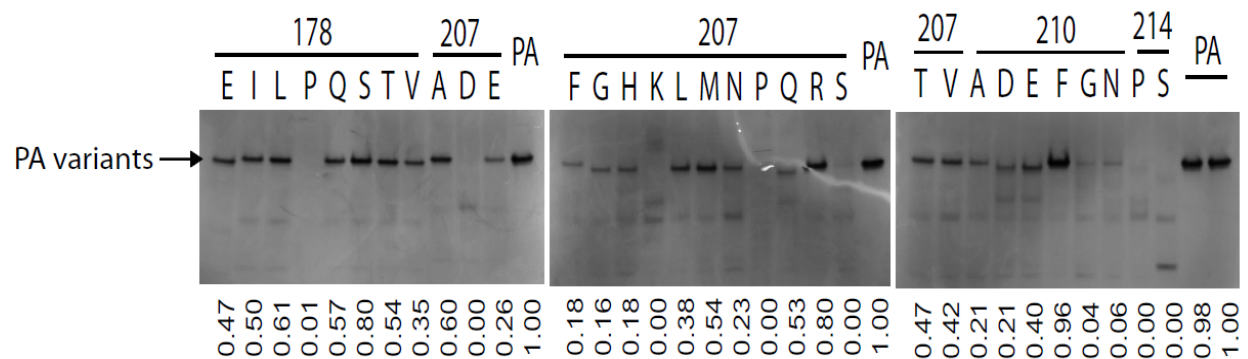

**Figure S1.** PA variant proteins concentrated from culture supernatants of the corresponding expressing BH480 strains.

The transformed BH480 strains were grown overnight in 5 mL FA medium containing 20  $\mu$ g/mL kanamycin. The supernatants containing PA variant proteins were sterilized by centrifugation and concentrated 10-fold, and were analyzed by native gel electrophoresis. The protein concentrations were estimated by densitometry to compare the PA variant bands to a sample of purified PA with known concentration (the purified PA = 0.88 mg/mL). The relative concentrations of PA variant proteins to purified PA were given below of the images.

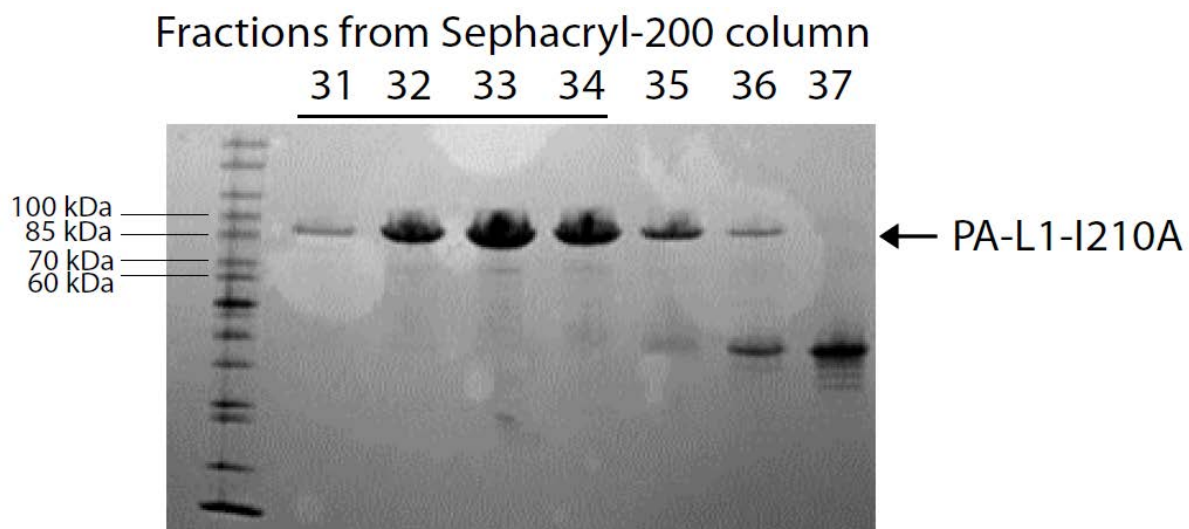

**Figure S2.** Fractions containing PA-L1-I210A eluted from the Sephacryl S-200 gel filtration column.

Partially purified PA-L1-I210A protein from chromatography on Q-Sepharose Fast Flow column (see Methods) was subjected to further purification by Sephacryl S-200 high resolution gel filtration. The fractions 31-34 with the major protein band of PA-L1-I210A shown on a SDS-PAGE gel were pooled, measured at A280, and stored at  $-80^{\circ}$  as the final product.
